# Supplementary material for: Coupling of electrochemically triggered thermal and mechanical effects to aggravate failure in a layered cathode
Source: PubMed Central journal article supplement (PMC6014973; doi:10.1038/s41467-018-04862-w), 2018-06-22
Supplement: 41467_2018_4862_MOESM2_ESM.pdf [file 41467_2018_4862_MOESM2_ESM.pdf]

## **Description of Additional Supplementary Files**

File Name: Supplementary Movie 1

Description: In situ visualizing heating triggered cracking
